# Supplementary material for: Integrating clinical and genetic approaches in the diagnosis of 46,XY disorders of sex development
Source: PubMed Central journal article supplement — Endocr Connect. 2018 Nov 28;7(12):1480–90. doi: 10.1530/EC-18-0472 (PMC6311460; doi:10.1530/ec-18-0472), 2018-11-28
Supplement: supplementary_table_1.pdf [file supplementary_table_1.pdf]

**Table S1.** CHH-related genes (21 genes).

| Gene          | Phenotype                                              | Inheritance | Location | OMIM   |
|---------------|--------------------------------------------------------|-------------|----------|--------|
| <i>ANOS1</i>  | Kallmann syndrome                                      | XL          | Xp22.31  | 300836 |
| <i>AXL</i>    | Kallmann syndrome or normosmic CHH                     | AD?         | 19q13.2  | 109135 |
| <i>CHD7</i>   | Kallmann syndrome or normosmic CHH;<br>CHARGE syndrome | AD          | 8q12.2   | 608892 |
| <i>FGF8</i>   | Kallmann syndrome or normosmic CHH                     | AD          | 10q24.32 | 600483 |
| <i>FGFR1</i>  | Kallmann syndrome or normosmic CHH                     | AD          | 8p11.23  | 136350 |
| <i>GNRH1</i>  | Normosmic CHH                                          | AR          | 8p21.2   | 152760 |
| <i>GNRHR</i>  | Normosmic CHH                                          | AR          | 4q13.2   | 138850 |
| <i>HS6ST1</i> | Kallmann syndrome or normosmic CHH                     | AD          | 2q14.3   | 614880 |
| <i>KISS1</i>  | Normosmic CHH                                          | AR          | 1q32.1   | 614842 |
| <i>KISS1R</i> | Normosmic CHH                                          | AR          | 19p13.3  | 604161 |
| <i>LEP</i>    | Normosmic CHH                                          | AR          | 7q32.1   | 614962 |
| <i>LEPR</i>   | Normosmic CHH                                          | AR          | 1p31.3   | 601007 |
| <i>NSMF</i>   | Kallmann syndrome or normosmic CHH                     | AD          | 9q34.3   | 614838 |
| <i>PCSK1</i>  | Normosmic CHH                                          | AR          | 5q15     | 162150 |
| <i>PROK2</i>  | Kallmann syndrome or normosmic CHH                     | AR/AD?      | 3p13     | 607002 |
| <i>PROKR2</i> | Kallmann syndrome or normosmic CHH                     | AR/AD?      | 20p12.3  | 607123 |
| <i>SEMA3A</i> | Kallmann syndrome                                      | AD          | 7q21.11  | 603961 |
| <i>SOX10</i>  | Kallmann syndrome; Waardenbourg<br>syndrome            | AD          | 22q13.1  | 602229 |
| <i>TAC3</i>   | Normosmic CHH                                          | AR          | 12q13.3  | 162330 |
| <i>TACR3</i>  | Normosmic CHH                                          | AR          | 4q24     | 162332 |
| <i>WDR11</i>  | Kallmann syndrome or normosmic CHH                     | AD          | 10q26.12 | 606417 |

Abbreviations: XL, X-linked; AD, autosomal dominant; CHH, congenital hypogonadotropic hypogonadism; AR; autosomal recessive
