# Supplementary material for: Integrating clinical and genetic approaches in the diagnosis of 46,XY disorders of sex development
Source: PubMed Central journal article supplement — Endocr Connect. 2018 Nov 28;7(12):1480–90. doi: 10.1530/EC-18-0472 (PMC6311460; doi:10.1530/ec-18-0472), 2018-11-28
Supplement: supplementary_table_2.pdf [file supplementary_table_2.pdf]

**Table S2.** Reference sequence transcripts.

| gene           | reference transcript |
|----------------|----------------------|
| <i>AKR1C4</i>  | NM_001818.3          |
| <i>AMH</i>     | NM_000479.4          |
| <i>ANOS1</i>   | NM_000216.3          |
| <i>AR</i>      | NM_000044.3          |
| <i>ARX</i>     | NM_139058.2          |
| <i>ATRX</i>    | NM_000489.4          |
| <i>CBX2</i>    | NM_032647.3          |
| <i>CHD7</i>    | NM_017780.3          |
| <i>CYP17A1</i> | NM_000102.3          |
| <i>DHCR7</i>   | NM_001360.2          |
| <i>DMRT1</i>   | NM_021951.2          |
| <i>FGF8</i>    | NM_033163.3          |
| <i>HOXA13</i>  | NM_000522.4          |
| <i>HSD17B3</i> | NM_000197.1          |
| <i>LHCGR</i>   | NM_000233.3          |
| <i>NR5A1</i>   | NM_004959.4          |
| <i>POR</i>     | NM_000941.2          |
| <i>SEMA3</i>   | NM_006080.2          |
| <i>SOX9</i>    | NM_000346.3          |
| <i>SRD5A2</i>  | NM_000348.3          |
| <i>STAR</i>    | NM_000349.2          |
| <i>TACR3</i>   | NM_001059.2          |
| <i>WT1</i>     | NM_000378.4          |
