# Supplementary material for: Integrating clinical and genetic approaches in the diagnosis of 46,XY disorders of sex development
Source: PubMed Central journal article supplement — Endocr Connect. 2018 Nov 28;7(12):1480–90. doi: 10.1530/EC-18-0472 (PMC6311460; doi:10.1530/ec-18-0472), 2018-11-28
Supplement: supplementary_table_3.pdf [file supplementary_table_3.pdf]

Table S3. Clinical findings in 35 patients with 46, XY DSD.

| ID | sex# | DSD subcategory | clinical diagnosis | age at referral | cause of referral                         | EM S score | Tanner stages | associated conditions                                                                                               |
|----|------|-----------------|--------------------|-----------------|-------------------------------------------|------------|---------------|---------------------------------------------------------------------------------------------------------------------|
| 1  | M    | DGD             | TRS                | 1y11m           | empty scrotum                             | 9          | prepubertal   | complex obstetric history (1 miscarriage, death of 2nd child in 1st day of life due to combined congenital defects) |
| 2  | M    | DGD             | TRS                | 2y8m            | empty scrotum                             | 9          | prepubertal   |                                                                                                                     |
| 3  | M    | DGD             | TRS                | 5y7m            | empty scrotum                             | 9          | prepubertal   |                                                                                                                     |
| 4  | M    | DGD             | TRS                | 7y4m            | empty scrotum                             | 9          | prepubertal   | SGA, gestational hypertension                                                                                       |
| 5  | M    | DGD             | TRS                | 8y10m           | empty scrotum                             | 9          | prepubertal   |                                                                                                                     |
| 6  | F    | DGD             | CGD                | 13y             | abdominal mass, delayed puberty           | 9          | B1P3          | yolk sac tumor, tall stature                                                                                        |
| 7  | F    | DGD             | CGD                | 14y6m           | recurrent abdominal pain, delayed puberty | 0          | B1P4          | no hormonal work-up prior to surgical treatment, bilateral gonadoblastoma, bilateral immature teratoma              |
| 8  | F    | DGD             | CGD                | 16y2m           | abdominal mass, primary amenorrhea        | 0          | B3P3          | c-section due to placenta praevia, prematurity, mixed germ cell tumor secreting E2, tall stature                    |
| 9  | F    | DGD             | CGD                | 17y8m           | primary amenorrhea                        | 0          | B1P4          | bilateral gonadoblastoma secreting T, tall stature                                                                  |
| 10 | M    | DAS             | 5 $\alpha$ RD      | 10m             | atypical genitalia                        | 9          | prepubertal   |                                                                                                                     |
| 11 | M    | DAS             | 5 $\alpha$ RD      | 12m             | atypical genitalia                        | 9          | prepubertal   | bilateral sandal gap (limb anomalies)                                                                               |
| 12 | M    | DAS             | 5 $\alpha$ RD      | 2y1m            | atypical genitalia                        | 9          | prepubertal   | prematurity                                                                                                         |

|    |   |      |        |       |                    |     |             |                                                                                                       |
|----|---|------|--------|-------|--------------------|-----|-------------|-------------------------------------------------------------------------------------------------------|
| 13 | F | DAS  | DAS    | 21m   | atypical genitalia | 3   | prepubertal | right side inguinal hernia, gonadectomy at the age of 2y10m, testes on histopathology                 |
| 14 | M | DAA  | NSDU M | 11d   | atypical genitalia | 9   | prepubertal | SGA, normal urinary system on US, glanular hypospadias in father                                      |
| 15 | M | DAA  | NSDU M | 22d   | atypical genitalia | 5   | prepubertal | positive family history for AIS                                                                       |
| 16 | M | DAA  | NSDU M | 3m    | atypical genitalia | 6   | prepubertal |                                                                                                       |
| 17 | M | DAA  | NSDU M | 3m    | atypical genitalia | ?   | prepubertal | SGA, c-section due to fetal distress, umbilical hernia                                                |
| 18 | M | DAA  | NSDU M | 6m    | atypical genitalia | 6   | prepubertal | c-section due to breech position                                                                      |
| 19 | M | DAA  | NSDU M | 3y3m  | atypical genitalia | 7.5 | prepubertal | SGA, c-section due to fetal distress, prematurity, underweight                                        |
| 20 | F | DAA  | CAIS   | 10d   | atypical genitalia | 3   | prepubertal | bilateral inguinal hernias, positive family history for AIS                                           |
| 21 | F | DAA  | CAIS   | 5y10m | atypical genitalia | 1   | prepubertal | asthma                                                                                                |
| 22 | F | DAA  | CAIS   | 165m  | primary amenorrhea | 0   | B5P2        | tall stature, obesity                                                                                 |
| 23 | F | DAA  | CAIS   | 17y4m | primary amenorrhea | 0   | B5P2        | pectus excavatum                                                                                      |
| 24 | F | DAA  | CAIS   | 17y9m | primary amenorrhea | 2   | B5P2        | c-section due to fetal distress, bilateral inguinal hernias, tall stature, overweight                 |
| 25 | F | DAA  | CAIS   | 17y9m | primary amenorrhea | 1   | B5P2        | tall stature, unilateral inguinal hernia                                                              |
| 26 | F | DAA  | CAIS   | 14y6m | primary amenorrhea | 2   | B5P2        | c-section due to placental abruption, bilateral inguinal hernias, hyposmia                            |
| 27 | F | DAA  | PAIS   | 6m    | atypical genitalia | 3   | prepubertal | SGA, c-section due to fetal distress, oligohydramnios, prematurity                                    |
| 28 | M | sDSD | sDSD   | 2m    | atypical genitalia | 6   | prepubertal | atrial septal defect type II, left kidney ectopy, with time idiopathic hypertransaminasemia developed |

|         |   |      |      |        |                                               |   |             |                                                                                                                                                                                                                                                                                         |
|---------|---|------|------|--------|-----------------------------------------------|---|-------------|-----------------------------------------------------------------------------------------------------------------------------------------------------------------------------------------------------------------------------------------------------------------------------------------|
| 29<br>† | M | sDSD | sDSD | 2m     | atypical genitalia                            | 8 | prepubertal | SGA, c-section due to breech position, congenital heart defect, left kidney ectopy, nonautoimmunological primary hypothyroidism, with time hypergonadotropic hypogonadism developed, older brother of patient ID 30                                                                     |
| 30<br>† | M | sDSD | sDSD | 6m     | atypical genitalia                            | 6 | prepubertal | facial dysmorphia, multiple pituitary hormone deficiency (TSH, GH, ACTH), pituitary posterior lobe ectopy, younger brother of patient ID 29                                                                                                                                             |
| 31      | M | sDSD | sDSD | 18m    | atypical genitalia                            | 4 | prepubertal | SGA, complex obstetric history (4th pregnancy, 2nd delivery, 2 miscarriages), facial dysmorphia, psychomotor delay, hypotonia, left side hypoacusis, patent foramen ovale, hip dysplasia, asthma, dilatation of the ventricular system and the frontal lobes subarachnoid spaces on MRI |
| 32      | M | sDSD | sDSD | 2y2m   | atypical genitalia with adrenal insufficiency | 8 | prepubertal | primary adrenal insufficiency, epilepsy, mild developmental delay, with time hypergonadotropic hypogonadism developed                                                                                                                                                                   |
| 33<br>‡ | M | sDSD | sDSD | 6y10m  | atypical genitalia                            | 3 | prepubertal | SGA, epilepsy, diaphragmatic hernia, younger brother of patient ID 34                                                                                                                                                                                                                   |
| 34<br>‡ | M | sDSD | sDSD | 12y10m | atypical genitalia                            | 3 | G2P2        | obesity, short stature (rhGH treatment), hypermetropia, older brother of patient ID 33                                                                                                                                                                                                  |
| 35      | F | sDSD | sDSD | 7d     | atypical genitalia                            | 0 | prepubertal | c-section due to fetal distress, facial dysmorphia, microcephaly, syndactyly of 2nd and 3rd toes, clinodactyly of 2nd and 3rd fingers of the left hand, psychomotor delay, short stature (rhGH treatment), dilatation of subarachnoid spaces on MRI                                     |

#sex of rearing; †first pair of siblings; ‡second pair of siblings

Abbreviations: DSD, disorder of sex development; EMS, external masculinisation score; M, male; DGD, disorder of gonadal development; TRS, testicular regression syndrome; y, years; m, months; SGA, small for gestational age; F, female; CGD, complete gonadal dysgenesis; E2, estradiol; T, testosterone; DAS, disorder of androgen synthesis; 5 $\alpha$ RD, 5 $\alpha$ -reductase deficiency; NSDUM, non-specific disorder of

undermasculinisation; d, days; US, ultrasound; AIS, androgen insensitivity syndrome; CAIS, complete androgen insensitivity syndrome; sDSD, syndromic DSD; rhGH, recombinant human growth hormone; TSH, thyroid stimulating hormone; GH, growth hormone; ACTH, adrenocorticotrophic hormone
