# Supplementary material for: Integrating clinical and genetic approaches in the diagnosis of 46,XY disorders of sex development
Source: PubMed Central journal article supplement — Endocr Connect. 2018 Nov 28;7(12):1480–90. doi: 10.1530/EC-18-0472 (PMC6311460; doi:10.1530/ec-18-0472), 2018-11-28
Supplement: supplementary_table_4.pdf [file supplementary_table_4.pdf]

**Table S4.** Biochemical and radiological findings in 35 patients with 46, XY DSD.

| ID | LH <sup>#</sup><br>[IU/L] | peak LH<br>after GnRH<br>test [IU/L] | FSH<br>[IU/L] | peak FSH<br>after GnRH<br>test [IU/L] | E2<br>[pg/mL] | T<br>[ng/mL]                   | T after<br>hCG test<br>[ng/mL] | AMH<br>[ng/mL] | Inhibin b<br>[pg/mL] | distinctive<br>biochemical trait                                 | abdomen ultrasound                                                                           |
|----|---------------------------|--------------------------------------|---------------|---------------------------------------|---------------|--------------------------------|--------------------------------|----------------|----------------------|------------------------------------------------------------------|----------------------------------------------------------------------------------------------|
| 1  | 0.1                       | nd                                   | 6.5           | nd                                    | nd            | 0.1                            | nd                             | 0              | 7.4                  |                                                                  | no Müllerian structures, hypoplastic left gonad in inguinal canal                            |
| 2  | 9.7                       | nd                                   | 91.1          | nd                                    | nd            | 0                              | 0.1                            | nd             | nd                   |                                                                  | no Müllerian structures, gonads not visible                                                  |
| 3  | 1.5                       | 32.3                                 | 38.1          | 111.2                                 | nd            | 0.1                            | 0.1                            | 0.1            | 0.9                  |                                                                  | no Müllerian structures, gonads not visible                                                  |
| 4  | <0.5                      | 5.3                                  | 7.2           | 31.1                                  | nd            | 0.1                            | 0.1                            | 1.2            | 0.3                  |                                                                  | no Müllerian structures, gonads not visible                                                  |
| 5  | <0.5                      | nd                                   | 3.4           | nd                                    | nd            | 0.1                            | 0.1                            | 0.1            | 0.9                  |                                                                  | no Müllerian structures, gonads not visible                                                  |
| 6  | 0.7                       | nd                                   | 0.7           | nd                                    | <20           | nd                             | nd                             | nd             | nd                   | AFP 23440 [ng/mL]                                                | infantile uterus, normal vagina's length, tumor arising from left gonad                      |
| 7  | nd                        | nd                                   | nd            | nd                                    | nd            | nd                             | nd                             | nd             | nd                   |                                                                  | infantile uterus, normal vagina's length, tumors arising from both gonads                    |
| 8  | 1.5                       | nd                                   | 4.7           | nd                                    | 125           | nd                             | nd                             | nd             | nd                   | AFP 1210 [ng/mL];<br>βhCG 13658<br>[mIU/mL]; LDH<br>1158 [IU/mL] | infantile uterus, normal vagina's length, tumor arising from left gonad                      |
| 9  | 27                        | nd                                   | 53.6          | nd                                    | 10            | 1.3                            | nd                             | nd             | nd                   |                                                                  | infantile uterus, normal vagina's length, visible gonads in typical localization for ovaries |
| 10 | <0.5                      | nd                                   | 0.5           | nd                                    | nd            | 0                              | 5.2                            | 211.6          | 174.6                | T/DHT after hCG<br>test 56                                       | no Müllerian structures                                                                      |
| 11 | <0.5                      | nd                                   | 0.8           | nd                                    | <20           | 0.1                            | 3.2                            | 123.2          | 67.9                 | T/DHT after hCG<br>test 32                                       | no Müllerian structures                                                                      |
| 12 | 0.1                       | nd                                   | 0.4           | nd                                    | nd            | 0.1                            | 4.5                            | 262.3          | 355.5                | T/DHT after hCG<br>test 32                                       | no Müllerian structures                                                                      |
| 13 | 0.8                       | nd                                   | 0.9           | nd                                    | 23            | 0                              | nd                             | nd             | nd                   |                                                                  | no Müllerian structures, blind ended vagina                                                  |
| 14 | 6.5                       | nd                                   | 1             | nd                                    | 12            | 1.5                            | nd                             | 130.4          | nd                   |                                                                  | no Müllerian structures                                                                      |
| 15 | 6                         | nd                                   | 1.2           | nd                                    | <20           | 4.9                            | nd                             | >440.9         | 544.9                |                                                                  | no Müllerian structures, gonads in inguinal canals                                           |
| 16 | 4.8                       | nd                                   | 2.3           | nd                                    | 31            | 0.6; at 7y <sup>†</sup><br>0.1 | at 7y 2.8                      | at 13y<br>7.8  | at 13y<br>208.9      |                                                                  | no Müllerian structures                                                                      |
| 17 | 8.3                       | nd                                   | 4.7           | nd                                    | nd            | 1                              | nd                             | at 17y 1       | at 17y 52.1          |                                                                  | no Müllerian structures                                                                      |
| 18 | <0.5                      | nd                                   | 0.8           | nd                                    | nd            | 0.1                            | 1.2                            | 175.8          | 194.6                |                                                                  | no Müllerian structures                                                                      |
| 19 | <0.5                      | nd                                   | 0.8           | nd                                    | nd            | 0.3                            | 1.3                            | 93.7           | 65.7                 |                                                                  | no Müllerian structures, left gonad invisible                                                |
| 20 | 0.4                       | nd                                   | 0.2           | nd                                    | 11            | 0.1                            | 5.4                            | 155.7          | 401.9                |                                                                  | no Müllerian structures, blind ended vagina                                                  |

|    |                    |     |                     |       |      |                   |           |                 |                  |                                          |                                                    |
|----|--------------------|-----|---------------------|-------|------|-------------------|-----------|-----------------|------------------|------------------------------------------|----------------------------------------------------|
| 21 | 0.3                | nd  | 1.5                 | nd    | 11   | 0.3               | 2.9       | 80.7            | 196.5            |                                          | no Müllerian structures, blind ended vagina        |
| 22 | 19.2               | nd  | 7                   | nd    | 39   | 8.4               | nd        | >440.9          | 298              |                                          | no Müllerian structures, blind ended vagina        |
| 23 | 24                 | nd  | 19                  | nd    | 39   | 10.7              | nd        | 184.3           | 175.8            |                                          | no Müllerian structures, blind ended vagina        |
| 24 | 9.7                | nd  | 4                   | nd    | 48   | 5.1               | nd        | 193.6           | 346.1            |                                          | no Müllerian structures, blind ended vagina        |
| 25 | 21.9               | nd  | 8.3                 | nd    | 38   | 8                 | nd        | 393.8           | 401.2            |                                          | no Müllerian structures, blind ended vagina        |
| 26 | 23.4               | nd  | 11                  | nd    | 53.8 | 11.5              | nd        | nd              | nd               |                                          | no Müllerian structures, blind ended vagina        |
| 27 | 4.7                | nd  | 1.1                 | nd    | <20  | 0.5               | 2.7       | 47.6            | 299.7            |                                          | no Müllerian structures                            |
| 28 | 15.4               | nd  | 56.3                | nd    | nd   | 0.8; at 2y<br>0.1 | at 2y 0.3 | nd              | nd               |                                          | no Müllerian structures                            |
| 29 | at<br>13y8m<br>4.8 | nd  | at<br>13y8m<br>12.2 | nd    | nd   | 6.8               | nd        | at 13y8m<br>4.2 | at 13y8m<br>73.3 |                                          | no Müllerian structures, gonads in inguinal canals |
| 30 | 0.5                | 2   | 1.3                 | 2.9   | nd   | nd                | nd        | 222.7           | 165.2            | ACTH [8.8 pg/mL];<br>cortisol [29 ng/mL] | no Müllerian structures                            |
| 31 | 0.12               | 4.8 | 0.5                 | 1.8   | nd   | 0.1               | 2.6       | 206             | nd               | T/DHT after hCG<br>test 44               | no Müllerian structures                            |
| 32 | 1.1                | nd  | 1.2                 | nd    | nd   | nd                | 0.1       | nd              | nd               | ACTH [511 pg/mL];<br>cortisol [8 ng/mL]  | no Müllerian structures, gonads in inguinal canals |
| 33 | <0.5               | 5.7 | 3                   | 124.3 | nd   | 0.1               | 0.8       | 46.8            | 90.6             |                                          | no Müllerian structures                            |
| 34 | 2.2                | nd  | 5.6                 | nd    | nd   | 0.9               | 4.3       | 2.7             | 122.9            |                                          | no Müllerian structures                            |
| 35 | nd                 | nd  | nd                  | nd    | 46   | 1.4               | nd        | nd              | nd               |                                          | no Müllerian structures                            |

Abbreviations: LH, luteinizing hormone; FSH, follicle-stimulating hormone; E2, estradiol; T, testosterone; AMH, anti-Müllerian hormone; nd, no data; AFP, alfa-fetoprotein; βhCG, beta-human chorionic gonadotropin; LDH, lactate dehydrogenase; DHT, dihydrotestosterone; y, years; m, months; ACTH, adrenocorticotrophic hormone

†the specific age is given when assessed at different time than age of referral

# age specific reference values: LH: 0.5-12.0; FSH: 1.0-12.0; E2: 11.0-44.0; T median (2.5-97.5 percentile): mini-puberty: 1.6 (0.1-3.6), childhood: 0.1 (0-0.3), Tanner 1: 0.1 (0-0.2), Tanner 2: 0.2 (0-1.6), Tanner 3: 2.3 (0-5.1), Tanner 4: 3.5 (1.2-6.9), Tanner 5: 5 (2.2-7.6); AMH

median (2.5-97.5 percentile): mini-puberty: 198.2 (141.8-365.3), childhood: 142.9 (74.8-252.7), Tanner 1: 131.9 (60.8-230.5), Tanner 2: 47.9 (8.7-212), Tanner 3: 12.5 (4.2-138.9), Tanner 4: 8.1 (2.8-21.2); Tanner 5: 9.3 (4.4-24.2); Inhibin B median (2.5-97.5 percentile): mini-puberty: 270 (210-335), childhood: 80 (50-130), Tanner 1: 78 (35-182), Tanner 2: 195 (62-338), Tanner 3: 163 (78-323), Tanner 4: 188 (67-304), Tanner 5: 187 (95-323)
