# Supplementary material for: Integrating clinical and genetic approaches in the diagnosis of 46,XY disorders of sex development
Source: PubMed Central journal article supplement — Endocr Connect. 2018 Nov 28;7(12):1480–90. doi: 10.1530/EC-18-0472 (PMC6311460; doi:10.1530/ec-18-0472), 2018-11-28
Supplement: supplementary_table_5.pdf [file supplementary_table_5.pdf]

Table S5. Variants identified in CHH genes.

| ID | Sex <sup>#</sup> | DSD category | Clinical diagnosis | CHH Gene     | Inheritance | GnomAD frequency | DNA change | Protein change | SIFT | MT | ACMG classification |
|----|------------------|--------------|--------------------|--------------|-------------|------------------|------------|----------------|------|----|---------------------|
| 6  | F                | DGD          | CGD                | <i>TACR3</i> | AR          | 0.03%            | c.824G>A   | p.Trp275*      |      |    | VUS                 |
| 7  | F                | DGD          | CGD                | <i>CHD7</i>  | AD          |                  | c.825C>G   | p.Phe275Leu    | D    | D  | VUS                 |
| 9  | F                | DGD          | CGD                | <i>SEMA3</i> | AD          | 0.02%            | c.1450C>T  | p.Arg484Trp    | D    | D  | VUS                 |
| 26 | F                | DAA          | CAIS               | <i>ANOS1</i> | XL          | 0.22%            | c.1759G>T  | p.Val587Leu    | T    | D  | VUS                 |
| 28 | M                | sDSD         | sDSD               | <i>FGF8</i>  | AD          | 0.11%            | c.77C>T    | p.Pro26Leu     | T    | D  | VUS                 |

Abbreviations: DSD, disorder of sex development; CHH, congenital hypogonadotropic hypogonadism; GnomAD, Genome Aggregation Database; SIFT, Sorting Intolerant From Tolerant; MT, MutationTaster; ACMG, American College of Medical Genetics and Genomics; F, female; DGD, disorder of gonadal development; CGD, complete gonadal dysgenesis; AR, autosomal recessive; VUS, variant of uncertain significance; AD, autosomal dominant; D, deleterious; DAA, disorder of androgen action; CAIS, complete androgen insensitivity syndrome; XL, X-linked; T, tolerated; M, male; sDSD, syndromic disorder of sex development

<sup>#</sup>Sex of rearing
